# Supplementary material
Source: publisher figshare collection journal article supplement (https://acs.figshare.com/ndownloader/files/5734833)
Supplement: Supplementary file 1 [file 5734833]

**Supplementary Material:**

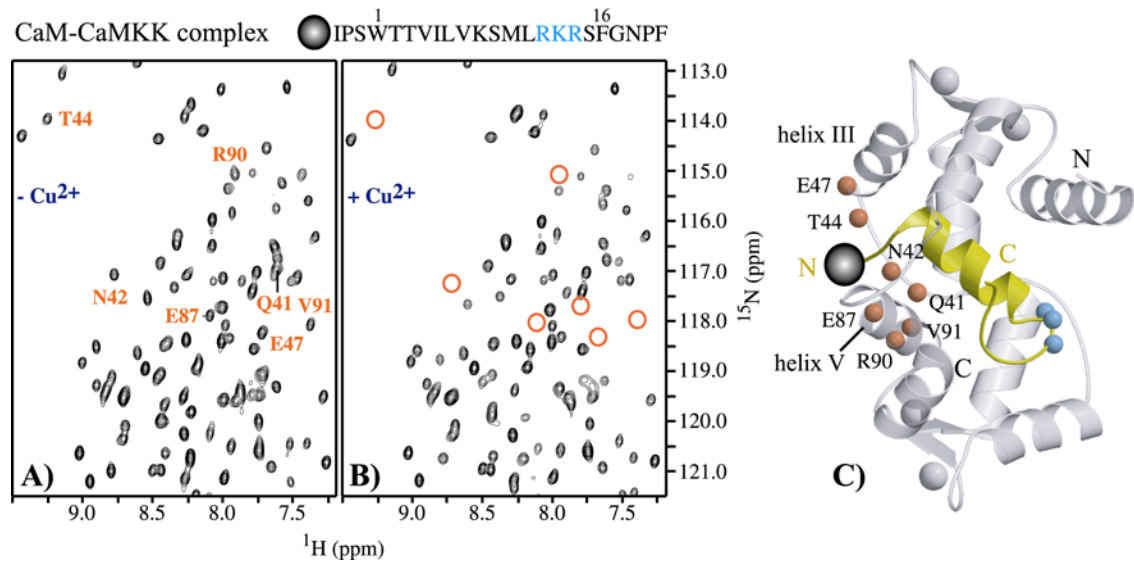

**Figure.**  $^1\text{H}$ - $^{15}\text{N}$  HSQC spectra of the CaM-CaMKK complex without (A) and with (B) stoichiometric amounts of  $\text{Cu}^{2+}$ .
